# Supplementary material for: AMPK modulatory activity of olive–tree leaves phenolic compounds: Bioassay-guided isolation on adipocyte model and in silico approach
Source: PLoS One. 2017 Mar 9;12(3):e0173074. doi: 10.1371/journal.pone.0173074 (PMC5344353; doi:10.1371/journal.pone.0173074)

**AMPK modulatory activity of olive**–**tree leaves phenolic compounds: bioassay-guided isolation on adipocyte model and in silico approach**

Cecilia Jiménez–Sánchez1,2, Mariló Olivares–Vicente3, Celia Rodríguez–Pérez1,2, María Herranz–López3, Jesús Lozano–Sánchez1,2, Antonio Segura–Carretero1,2, Alberto Fernández–Gutiérrez1,2, José Antonio Encinar3¶, Vicente Micol3,4*¶

1 Department of Analytical Chemistry, University of Granada. Granada, Spain.

2 Research and Development of Functional Food Centre (CIDAF), PTS, Granada, Spain.

3 Instituto de Biología Molecular y Celular (IBMC), Miguel Hernández University (UMH), Elche, Alicante, Spain

4 CIBER: CB12/03/30038, Fisiopatología de la Obesidad y la Nutrición, CIBERobn, Instituto de Salud Carlos III (ISCIII), Palma de Mallorca, Spain.

* Corresponding author

Email: [vmicol@umh.es](mailto:vmicol@umh.es) (VM)

¶ These authors share co-senior authorship.

**Supporting information**


2 Fig.. This BPC was obtained,


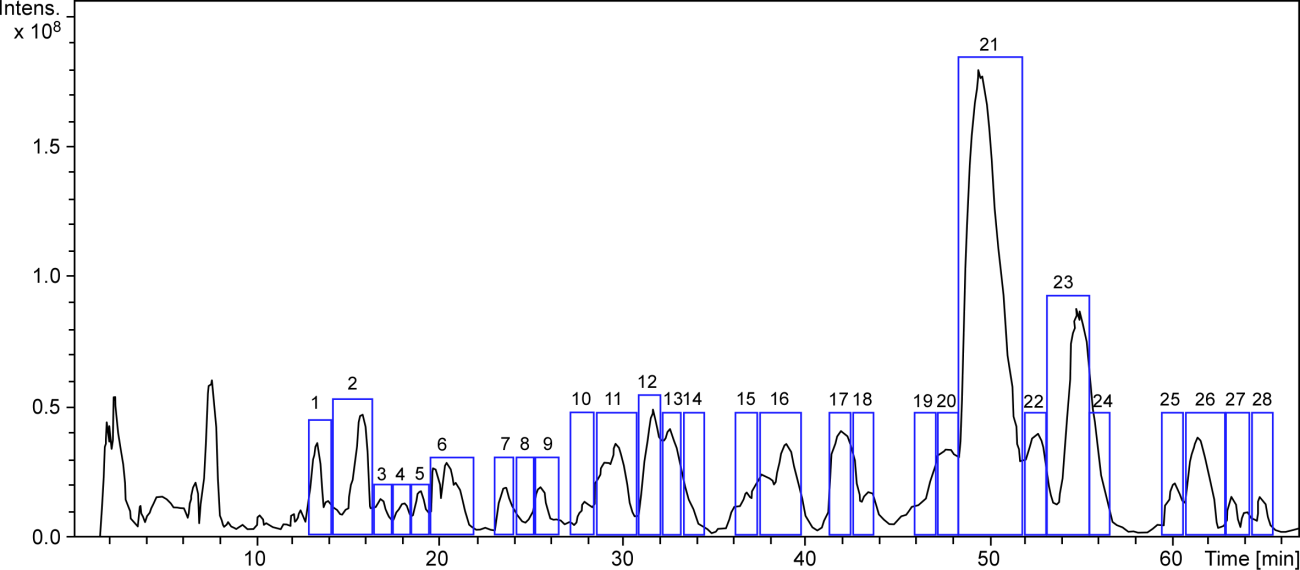

Supplement: S2 Fig — This BPC was obtained in negative ion mode of the olive leaf extract, with the optimized semi-preparative conditions, and the collected fractions highlighted in blue. (DOCX) [file pone.0173074.s002.docx]
