# Supplementary material for: AMPK modulatory activity of olive–tree leaves phenolic compounds: Bioassay-guided isolation on adipocyte model and in silico approach
Source: PLoS One. 2017 Mar 9;12(3):e0173074. doi: 10.1371/journal.pone.0173074 (PMC5344353; doi:10.1371/journal.pone.0173074)

**AMPK modulatory activity of olive**–**tree leaves phenolic compounds: bioassay-guided isolation on adipocyte model and in silico approach**

Cecilia Jiménez–Sánchez1,2, Mariló Olivares–Vicente3, Celia Rodríguez–Pérez1,2, María Herranz–López3, Jesús Lozano–Sánchez1,2, Antonio Segura–Carretero1,2, Alberto Fernández–Gutiérrez1,2, José Antonio Encinar3¶, Vicente Micol3,4*¶

1 Department of Analytical Chemistry, University of Granada. Granada, Spain.

2 Research and Development of Functional Food Centre (CIDAF), PTS, Granada, Spain.

3 Instituto de Biología Molecular y Celular (IBMC), Miguel Hernández University (UMH), Elche, Alicante, Spain

4 CIBER: CB12/03/30038, Fisiopatología de la Obesidad y la Nutrición, CIBERobn, Instituto de Salud Carlos III (ISCIII), Palma de Mallorca, Spain.

* Corresponding author

Email: [vmicol@umh.es](mailto:vmicol@umh.es) (VM)

¶ These authors share co-senior authorship.

**Supporting information**


**3 Fig.**


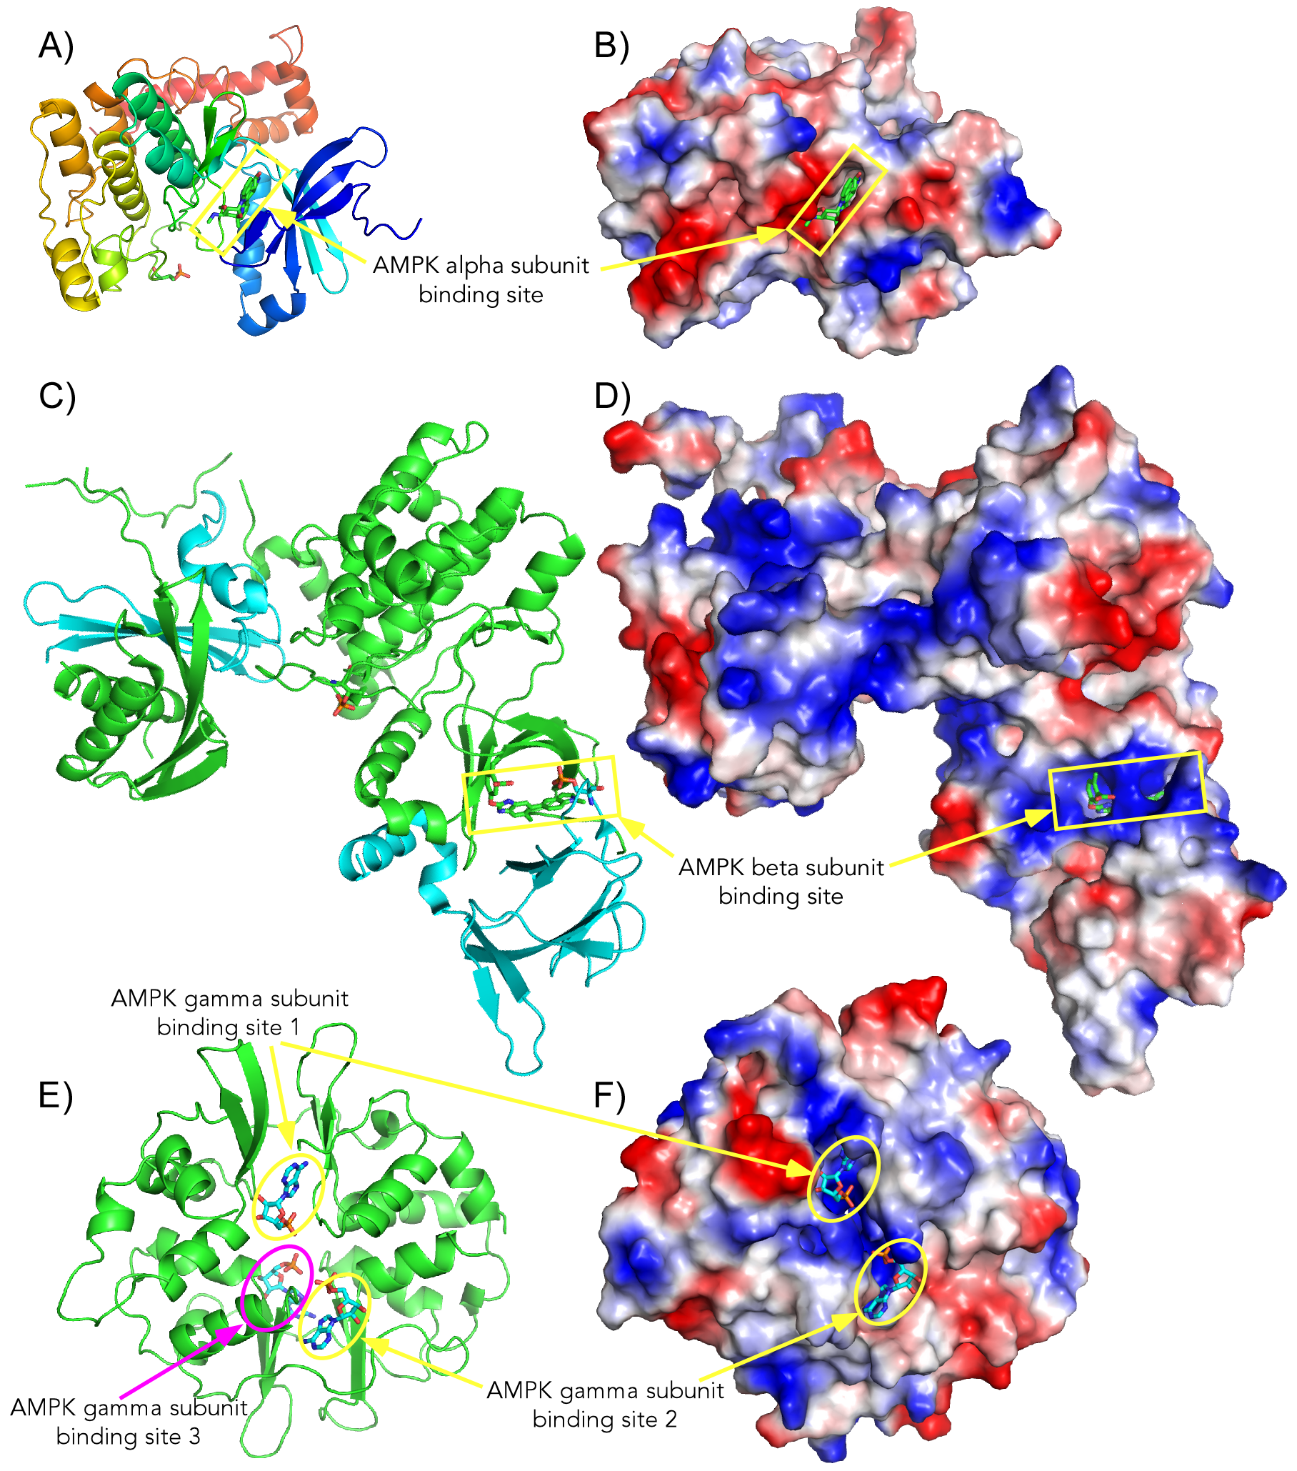

Supplement: S3 Fig — Panels A, C and E show the secondary structure of alpha, beta and gamma subunits of AMPK kinase (4CFE.pdb), respectively. Panels B, D and F represent the electrostatic potential surface with a co-crystalized ligand indicating the position of each binding sites. (DOCX) [file pone.0173074.s003.docx]
